# Supplementary material
Source: PubMed Central journal article supplement (PMC2605643)

**Fig. S1**

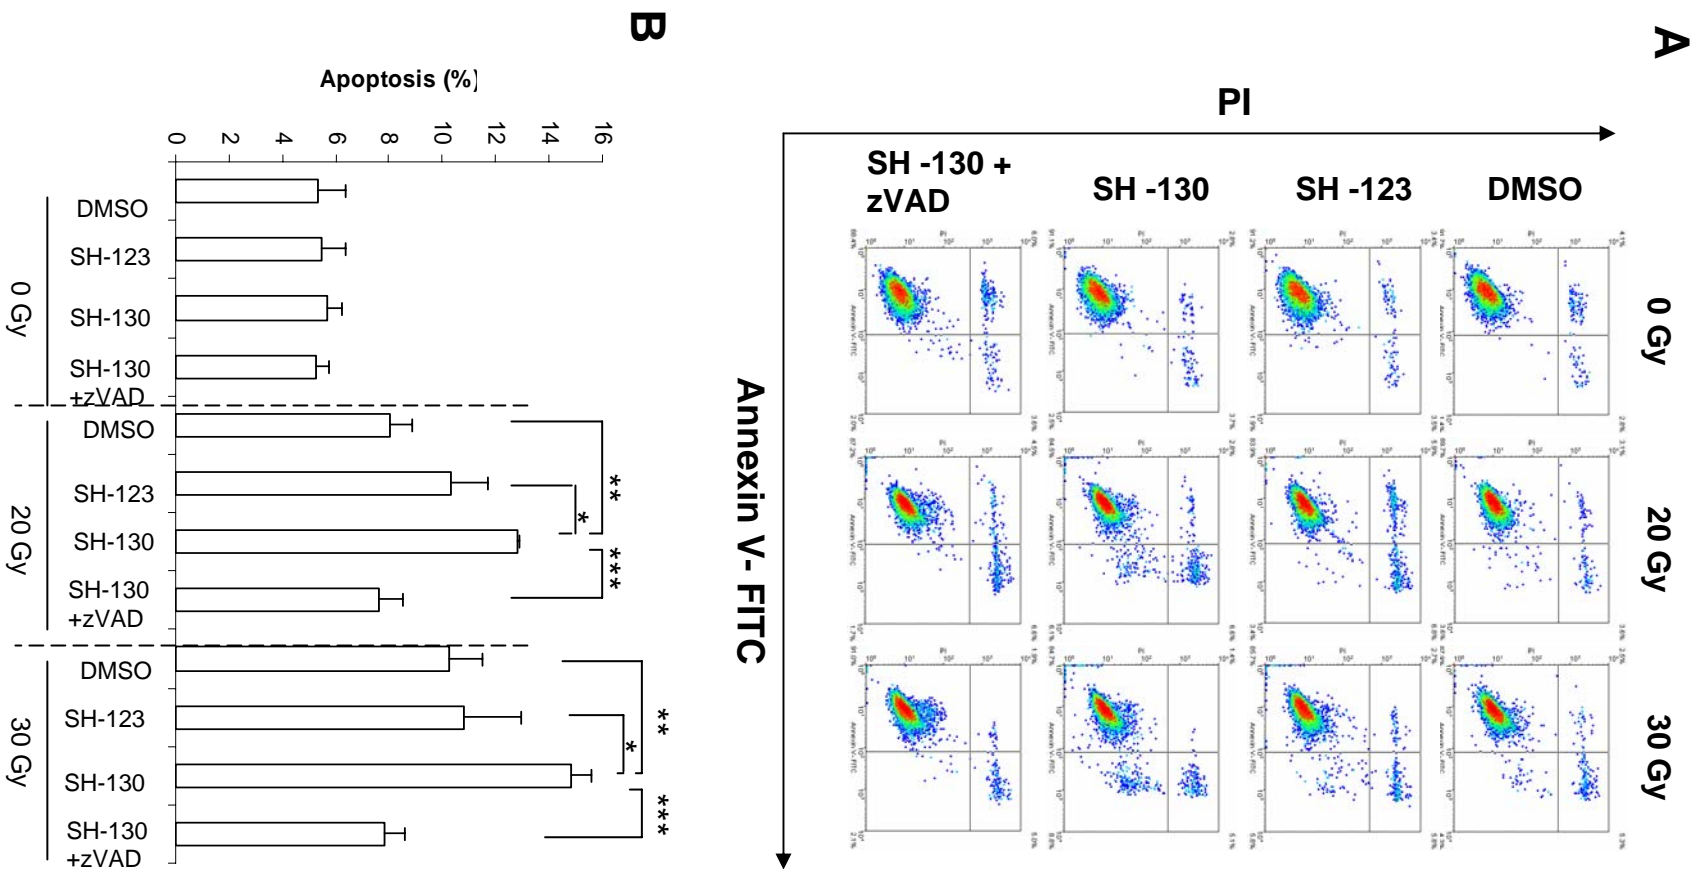

Fig. S2

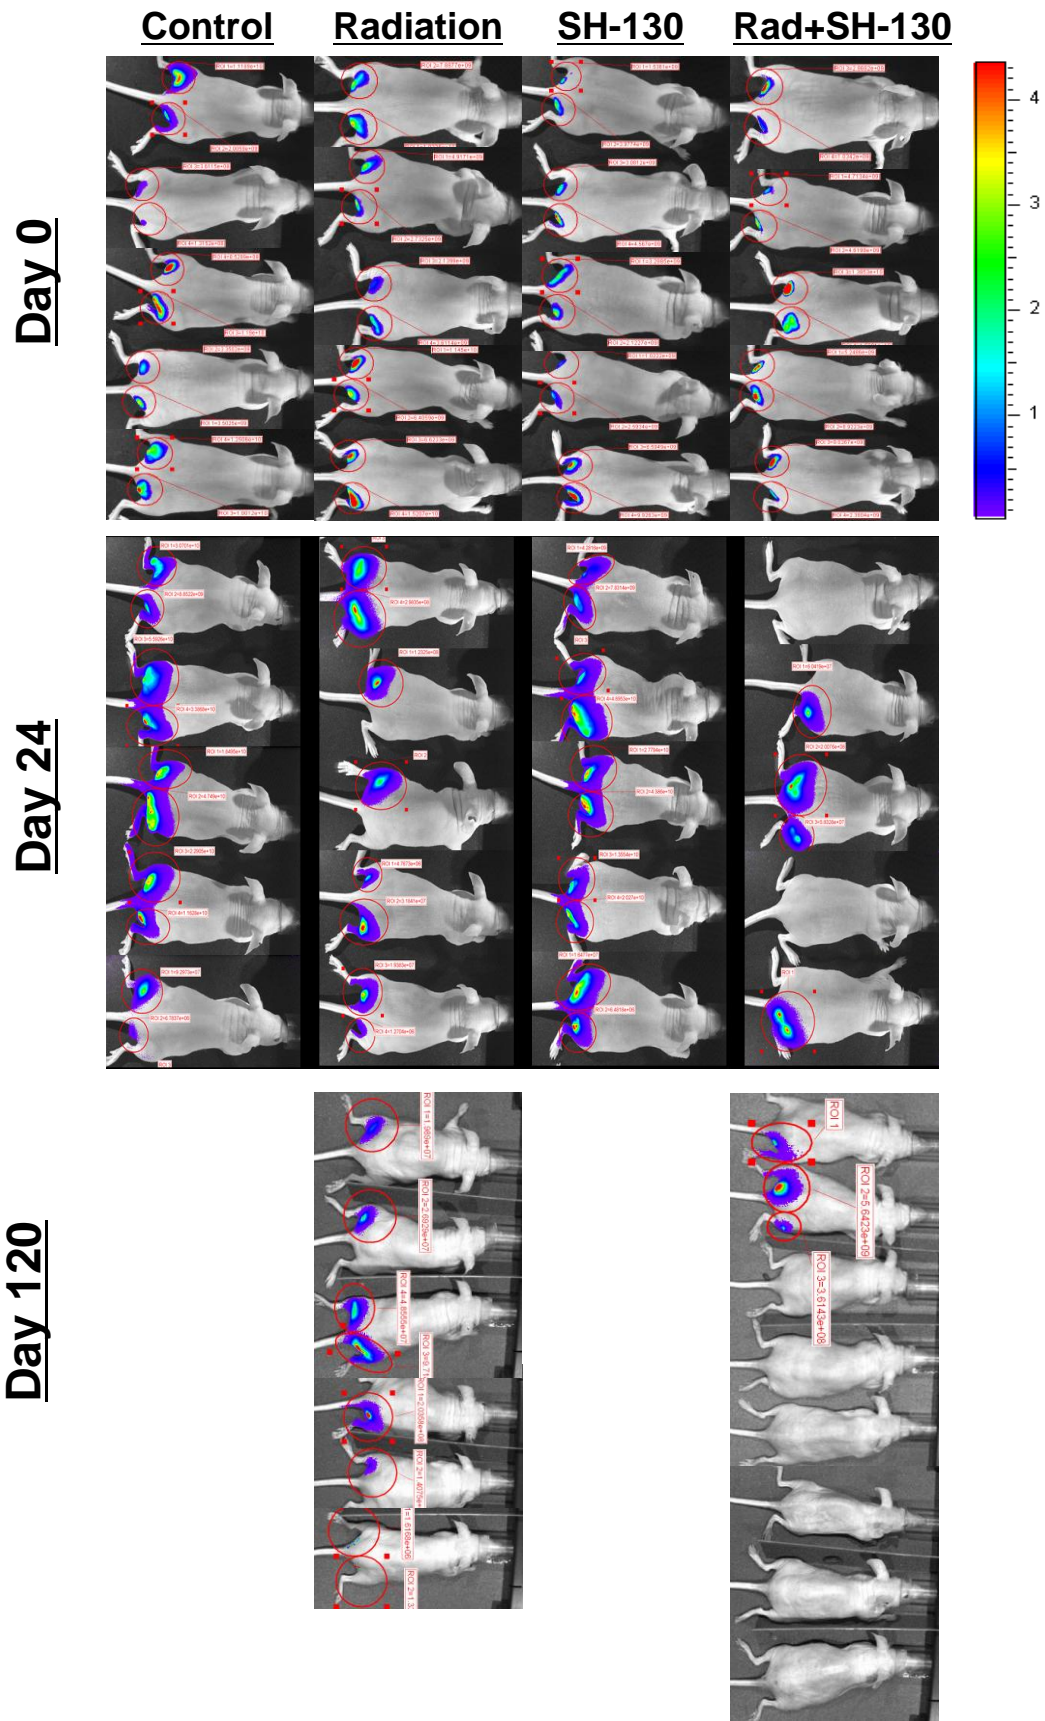

**Fig. S3**

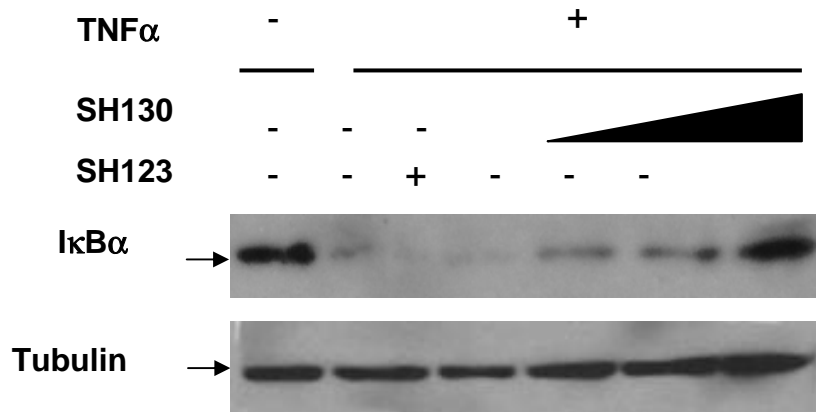

**Fig. S4**

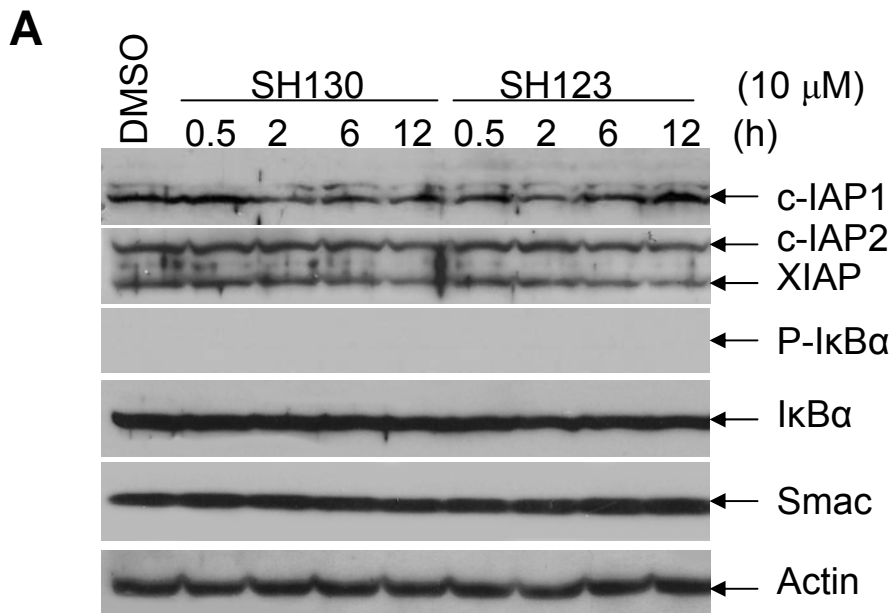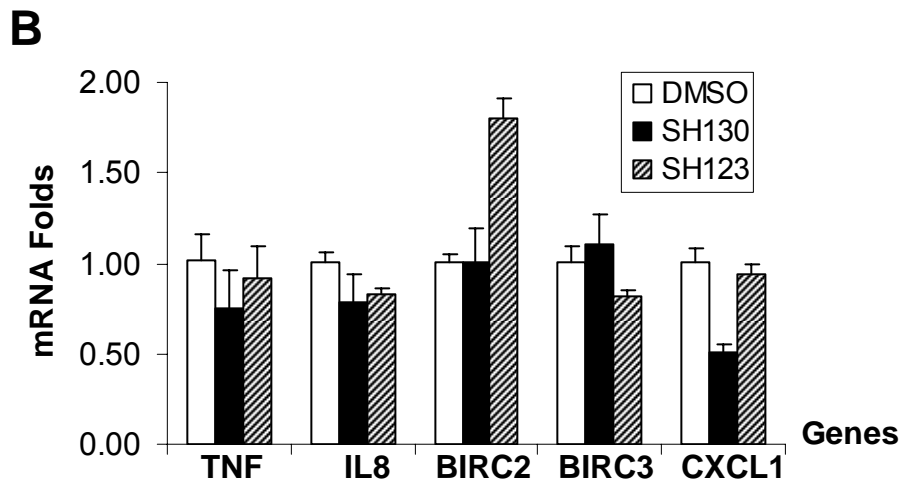

Supplement: NIHMS82709-supplement-Fig_S1-S4.pdf [file NIHMS82709-supplement-Fig_S1-S4.pdf]
